# Supplementary material for: Urtica dioica Whole Vegetable as a Functional Food Targeting Fat Accumulation and Insulin Resistance-a Preliminary Study in a Mouse Pre-Diabetic Model
Source: PubMed Central journal article supplement (PMC7231388; doi:10.3390/nu12041059), 2020-04-10
Supplement: nutrients-12-01059-s001.pdf [file nutrients-12-01059-s001.pdf]

**Supplementary Table 1. Primers used for qPCR.**

|     | <b>Gene Symbol</b> | <b>Forward</b>                 | <b>Reverse Primer</b>          |
|-----|--------------------|--------------------------------|--------------------------------|
| 1.  | B-Actin            | 5-GGCACCACACCTTCTACAATG-3'     | 5'-GGGGTGTTGAAGGTCTCAAAC-3'    |
| 2.  | FIAF/Angptl4       | 5'-TTTCCCTGCCCTTCTCTACT-3'     | 5'-GTACCAAACCACCAGCCA-3'       |
| 3.  | UCP-1              | 5'-CAAATCAGCTTTGCCTCACTC-3'    | 5'-CACACCTCCAGTCATTAAGCC-3'    |
| 4.  | G6PC               | 5'-TCTACCTTGCTGCTGCTCACTTTC-3' | 5'-GGAGGCTGGCATTGTAGATG-3'     |
| 5.  | Srebp-1c           | 5'-GAACAGACACTGGCCGAGAT-3'     | 5'-GAGGCCAGAGAAGCAGAAGAG-3'    |
| 6.  | Ptl                | 5'-CCTGAACAGTGCTGAAGTGAG-3'    | 5'-ACAGTACACATTTACTGCATCCC-3'  |
| 7.  | Pgc1a              | 5'-CTCCATGCCTGACGGCACCC-3'     | 5'-GCAGGGACGTCTTTGTGGCT-3'     |
| 8.  | Ppara              | 5'-ATGCCAGTACTGCCGTTTTCA-3'    | 5'-GGGCCACAGAGCACCAATCTGTG-3'  |
| 9.  | PPARg              | 5'-GTGCCAGTTTCGATCCGTAGA-3'    | 5'-GGCCAGCATCGTGTAGATGA-3'     |
| 10. | CD36               | 5'-TGGCCTTACTTGGGATTGG-3'      | 5'-CCAGTGTATATGTAGGCTCATCCA-3' |
| 11. | Foxo1              | 5'-ACATTCGTCCTCGAACCAGCTCA-3'  | 5'-ATTTCAGACAGACTGGGCAGCGTA-3' |
| 12. | F4/80              | 5'-CTTTGGCTATGGGCTTCCAGTCC-3'  | 5'-GCAAGGAGGACAGAGTTTATCGTG-3' |
| 13. | FASN               | 5'-AGCGGCCATTTCCATTGCC-3'      | 5'-CCATGCCCAGAGGGTGGTTG-3'     |
| 14. | ACC1               | 5'-ACAGTGGAGCTAGAATTGGAC-3'    | 5'-ACTTCCCGACCAAGGACTTTG-3'    |
| 15. | Cpt-1a             | 5'-CAGAGGATGGACACTGTAAAGG-3'   | 5'-CGGCACTTCTTGATCAAGCC-3'     |
| 16. | Dgat1              | 5'-TGGCTGCATTTCAGATTGAG-3'     | 5'-GCTGGGAAGCAGATGATTGT-3'     |
| 17. | Dgat1              | 5'-CTTCCTGGTGCTAGGAGTGGC-3'    | 5'-GCTGGATGGGAAAGTAGTCTCGG-3'  |
| 18. | CD11c              | 5'-CTGGATAGCCTTTCTTCTGCTG-3'   | 5'-GCACACTGTGTCCGAACTCA-3'     |
| 19. | Cbep-a             | 5'-AAACAACGCAACGTGGAGAC-3'     | 5'-TGTCCAGTTCACGGCTCAG-3'      |
| 20. | Cbep-b             | 5'-GGGTTGTTGATGTTTTTGGTTT-3'   | 5'-GAAACGGAAAAGGTTCTCAAAA-3'   |
| 21. | Acox1              | 5'-TCGAAGCCAGCGTTACGAG-3'      | 5'-ATCTCCGTCGGGCGTAGG-3'       |

**Supplementary Table 2. Nutrient Analysis of leaves and stems of *Urtica dioica*.**

|                                       | Amount % | Analytical Method used   |
|---------------------------------------|----------|--------------------------|
| <i>Proximate Analysis</i>             |          |                          |
| Ash                                   | 12.8     | AOAC: 923.03             |
| Carbohydrates                         | 64.1     | By Calculation           |
| Protein (6.25)                        | 16.1     | AACC 46-30*; AOAC 992.15 |
| Total Fat                             | 2.2      | AOAC: 996.06             |
| <i>Fiber</i>                          |          |                          |
| Insoluble Dietary Fiber               | 48.3     | AOAC: 991.43*            |
| Soluble Dietary Fiber                 | 4.9      |                          |
| Total dietary Fiber                   | 53.3     |                          |
| <i>Fat</i>                            |          |                          |
| Saturated Fat                         | 0.54     | AOAC: 996.06*            |
| Monounsaturated Fat                   | 0.16     |                          |
| cis-cis polyunsaturated fat           | 1.40     |                          |
| Trans fat                             | 0.05     |                          |
| Moisture                              | 5.0      | AOAC: 945.43*, 934.01    |
| <i>Calories per 100g</i>              |          |                          |
| Calories                              | 340.26   | By calculation           |
| Calories, 2020                        | 136.74   |                          |
| Calories from Fat                     | 20.67    |                          |
| Calories from Saturated Fat           | 4.77     |                          |
| Calories (insoluble fiber subtracted) | 14.31    |                          |

Supplementary Table 3: Fatty acid profile of the leaves and stems *Urtica dioica*.

| Component Name        | Normalized by Weight | % (w/w) as Triglyceride in Product |
|-----------------------|----------------------|------------------------------------|
| C-12:0 Lauric         | 1.52%                | 0.021                              |
| C-16:0 Palmitic       | 18.0%                | 0.252                              |
| C-16:1 t-Hexadecenoic | 1.50%                | 0.021                              |
| C-18:0 Stearic        | 2.24%                | 0.031                              |
| C-18:1 t-Elaidic      | 0.75%                | 0.010                              |
| C-18:1 Oleic          | 7.45%                | 0.104                              |
| C-18:2 Linoleic       | 41.76%               | 0.585                              |
| C-20:0 Arachidic      | 0.74%                | 0.010                              |
| C-18:3 Linolenic      | 23.12%               | 0.324                              |
| C-22:0 Behenic        | 0.74%                | 0.010                              |
| C-20:4 Arachidonic    | 0.74%                | 0.010                              |
| C-23:0 Tricosanoic    | 1.48%                | 0.021                              |
| <b>Totals:</b>        | <b>100%</b>          | <b>1.40</b>                        |

**Supplementary Table 4.** Relative fold changes in expression of genes that are involved or impact Insulin signaling in skeletal muscle.

| <b>Insulin signaling</b>                                                              | <b>Symbol</b>   | <b>LF Vs HF</b>              | <b>HF VS HFUT</b>              | <b>LF Vs HFUT</b>            |
|---------------------------------------------------------------------------------------|-----------------|------------------------------|--------------------------------|------------------------------|
| Acetyl-Coenzyme A carboxylase alpha                                                   | Acaca           | -1.07±0.4                    | -1.36±0.3                      | -1.28±0.4                    |
| Acyl-Coenzyme A oxidase 1, palmitoyl                                                  | Acox1           | 1.01±0.06                    | -1.31±0.18                     | -1.21±0.01                   |
| Adrenergic receptor, alpha 1d                                                         | Adra1d          | 1.1±0.07                     | -1.08±0.6                      | 1.01±0.2                     |
| AE binding protein 1                                                                  | Aebp1           | -1.36±0.3                    | 1.04±0.09                      | -1.30±0.4                    |
| Thymoma viral proto-oncogene 1                                                        | Akt1            | 1.06±0.04                    | -1.00±0.01                     | 1.06±0.03                    |
| Thymoma viral proto-oncogene 2                                                        | Akt2            | 1.00±0.1                     | -1.22±0.2                      | -1.21±0.04                   |
| Thymoma viral proto-oncogene 3                                                        | Akt3            | 1.02±0.04                    | 1.02±0.03                      | 1.04±0.07                    |
| V-raf murine sarcoma 3611 viral oncogene homolog                                      | Araf            | -1.10±0.3                    | -1.10±0.07                     | -1.22±0.5                    |
| Bcl2-like 1                                                                           | Bcl2l1          | -1.00±0.3                    | -1.21±0.3                      | -1.21±0.4                    |
| Braf transforming gene                                                                | Braf            | -1.22±0.5                    | -1.17±0.3                      | -1.43±0.6                    |
| CAP, adenylate cyclase-associated protein 1 (yeast)                                   | Cap1            | -1.12±0.06                   | -1.07±0.3                      | -1.20±0.2                    |
| Casitas B-lineage lymphoma                                                            | Cbl             | -1.87±0.6                    | -1.04±0.3                      | -1.95±0.7                    |
| CCAAT/enhancer binding protein (C/EBP) $\alpha$                                       | Cebpa           | -1.11±0.2                    | 1.15±0.8                       | 1.45±0.6                     |
| CCAAT/enhancer binding protein (C/EBP) $\beta$                                        | Cebpb           | -1.24±0.2                    | 1.21±0.3                       | 1.03±0.6                     |
| Complement factor D (adipsin)                                                         | Cfd             | -1.21±0.01                   | -1.41±0.2                      | -5.95±1.6                    |
| Docking protein 1                                                                     | Dok1            | -1.16±0.5                    | -1.09±0.01                     | -1.27±0.6                    |
| Docking protein 2                                                                     | Dok2            | -1.67±0.1                    | 1.27±0.6                       | -1.15±0.7                    |
| Docking protein 3                                                                     | Dok3            | 1.56±0.7                     | -1.70±0.4                      | -1.09±0.06                   |
| Dual specificity phosphatase 14                                                       | Dusp14          | -1.10±0.01                   | 1.43±0.6                       | 1.30±0.03                    |
| Eukaryotic translation initiation factor 2B, subunit 1 $\alpha$                       | Eif2b1          | 1.05±0.01                    | -1.11±0.03                     | -1.06±0.3                    |
| <b>Eukaryotic translation initiation factor 4E binding protein 1</b>                  | <b>Eif4ebp1</b> | <b>-2.18±1.3<sup>a</sup></b> | <b>1.09±0.30.6<sup>b</sup></b> | <b>-2.12±1.6<sup>a</sup></b> |
| Excision repair cross-complementing rodent repair deficiency, complementation group 1 | Ercc1           | -1.32±0.3                    | -1.13±0.6                      | -1.50±0.6                    |
| Fructose biphosphatase 1                                                              | Fbp1            | 1.05±0.08 <sup>a</sup>       | -1.35±1.6                      | -2.81±1.4                    |
| FBJ osteosarcoma oncogene                                                             | Fos             | -1.26±0.5                    | -2.20±0.6                      | -2.77±1.6                    |
| Fibroblast growth factor receptor substrate 2                                         | Frs2            | -1.62±1.0                    | 1.06±0.6                       | -1.53±1.3                    |
| Fibroblast growth factor receptor substrate 3                                         | Frs3            | -1.22±0.6                    | -1.00±0.6                      | -1.23±0.06                   |
| <b>Glucose-6-phosphatase, catalytic</b>                                               | <b>G6pc</b>     | <b>2.12±0.01<sup>a</sup></b> | <b>-2.84±2.6<sup>b</sup></b>   | <b>-1.36±0.6<sup>c</sup></b> |
| Glucose-6-phosphatase, catalytic, 2                                                   | G6pc2           | -1.28±0.8                    | -1.37±1.1                      | -2.48±1.6                    |
| Growth factor receptor bound protein 2-associated protein 1                           | Gab1            | -1.52±0.7                    | -1.01±0.01                     | -1.54±0.6                    |
| Glucokinase                                                                           | Gck             | -1.44±0.7                    | -1.14±0.09                     | -1.65±0.9                    |
| Glycerol-3-phosphate dehydrogenase 1 (soluble)                                        | Gpd1            | -1.23±0.6                    | -1.14±0.6                      | -1.40±0.7                    |
| Growth factor receptor bound protein 10                                               | Grb10           | -1.97±0.9                    | 1.03±0.5                       | -1.92±0.6                    |
| Growth factor receptor bound protein 2                                                | Grb2            | -1.47±0.6                    | -1.23±0.9                      | -1.81±1.1                    |
| Glycogen synthase kinase 3 beta                                                       | Gsk3b           | -1.37±0.6                    | -1.10±0.01                     | -1.50±0.9                    |
| Hexokinase 2                                                                          | Hk2             | 1.07±0.06                    | -1.32±0.6                      | -1.24±0.04                   |
| Harvey rat sarcoma virus oncogene 1                                                   | Hras            | -1.29±0.7                    | 1.03±0.4                       | -1.25±0.3                    |
| Insulin-like growth factor I receptor                                                 | Igf1r           | -1.13±0.1                    | 1.07±0.1                       | -1.05±0.3                    |
| Insulin-like growth factor 2                                                          | Igf2            | -1.14±0.2                    | -1.14±0.3                      | -1.30±0.1                    |
| Insulin-like growth factor binding protein 1                                          | Igfbp1          | -1.28±0.2                    | -1.06±0.2                      | -1.05±0.4                    |
| Insulin I                                                                             | Ins1            |                              |                                |                              |
| Insulin-like 3                                                                        | Insl3           | -1.06±0.5                    | -1.18±0.2                      | -1.25±0.9                    |
| Insulin receptor substrate 1                                                          | Irs1            | -1.20±0.2                    | -1.15±0.1                      | -1.38±0.2                    |
| Insulin receptor substrate 2                                                          | Irs2            | -1.05±0.1                    | -1.08±0.3                      | -1.13±0.2                    |
| Jun oncogene                                                                          | Jun             | 1.01±0.3                     | -1.36±0.5                      | -1.23±0.3                    |
| Kruppel-like factor 10                                                                | Klf10           | 1.33±0.7                     | -2.07±0.4                      | -1.20±0.5                    |
| V-Ki-ras2 Kirsten rat sarcoma viral oncogene homolog                                  | Kras            | -1.18±0.4                    | -1.12±0.3                      | -1.32±0.3                    |
| Low density lipoprotein receptor                                                      | Ldlr            | -1.15±0.3                    | -1.10±0.4                      | -1.27±0.2                    |
| Leptin                                                                                | Lep             |                              |                                |                              |
| Mitogen-activated protein kinase kinase 1                                             | Map2k1          | 1.15±0.4                     | -1.16±0.06                     | -1.01±0.04                   |
| Mitogen-activated protein kinase 1                                                    | Mapk1           | 1.15±0.08                    | -1.17±0.08                     | -1.02±0.1                    |
| Mechanistic target of rapamycin (serine/threonine kinase)                             | Mtor            | 1.04±0.08                    | -1.25±0.6                      | -1.20±0.3                    |
| Non-catalytic region of tyrosine kinase adaptor protein 1                             | Nck1            | -1.04±0.05                   | 1.07±0.5                       | 1.02±0.3                     |

|                                                                              |             |                             |                               |                              |
|------------------------------------------------------------------------------|-------------|-----------------------------|-------------------------------|------------------------------|
| Nitric oxide synthase 2, inducible                                           | Nos2        | 1.26±0.3                    | 1.07±0.4                      | 1.35±0.5                     |
| Neuropeptide Y                                                               | Npy         |                             |                               |                              |
| Phosphoenolpyruvate carboxykinase 2 (mitochondrial)                          | Pck2        | -1.01±0.3                   | 1.11±0.4                      | -1.23±0.1                    |
| 3-phosphoinositide dependent protein kinase 1                                | Pdpk1       | 1.09±0.03                   | -1.17±0.4                     | -1.07±0.4                    |
| Phosphatidylinositol 3-kinase, catalytic, alpha polypeptide                  | Pik3ca      | -1.15±0.4                   | -1.07±0.4                     | -1.23±0.5                    |
| Phosphatidylinositol 3-kinase, catalytic, beta polypeptide                   | Pik3cb      | -1.40±0.2                   | -1.10±0.1                     | -1.53±0.5                    |
| Phosphatidylinositol 3-kinase, regulatory subunit, polypeptide 1 (p85 alpha) | Pik3r1      | -1.11±0.3                   | -1.07±0.1                     | -1.19±0.4                    |
| Phosphatidylinositol 3-kinase, regulatory subunit, polypeptide 2 (p85 beta)  | Pik3r2      | -1.07±0.3                   | -1.08±0.3                     | -1.15±0.5                    |
| Pyruvate kinase liver and red blood cell                                     | Pklr        |                             |                               |                              |
| Peroxisome proliferator activated receptor gamma                             | Pparg       | -1.14±0.4                   | -1.55±0.3                     | -1.76±0.9                    |
| Protein phosphatase 1, catalytic subunit, alpha isoform                      | Ppp1ca      | 1.17±0.1                    | -1.07±0.1                     | 1.09±0.1                     |
| Protein kinase C, gamma                                                      | Prkcg       | 1.03±0.4                    | 1.24±0.2                      | 1.28±0.1                     |
| Protein kinase C, iota                                                       | Prkci       | -1.10±0.01                  | -1.00±0.1                     | -1.10±0.4                    |
| Protein kinase C, zeta                                                       | Prkcz       | -1.79±0.1                   | 1.06±0.5                      | -1.69±0.4                    |
| Prolactin                                                                    | Prl         |                             |                               |                              |
| Protein tyrosine phosphatase, non-receptor type 1                            | Ptpn1       | -1.48±0.5                   | -1.09±0.4                     | -1.61±0.7                    |
| Protein tyrosine phosphatase, receptor type, F                               | Ptprf       | -1.07±0.4                   | -1.28±0.3                     | -1.37±0.1                    |
| V-raf-leukemia viral oncogene 1                                              | Raf1        | -1.12±0.1                   | -1.09±0.1                     | -1.23±0.4                    |
| Resistin                                                                     | Retn        | -1.13±0.5                   | -1.19±0.1                     | -1.46±0.7                    |
| Ribosomal protein S6 kinase polypeptide 1                                    | Rps6ka1     | -1.05±0.5                   | -1.14±0.1                     | -1.20±0.3                    |
| Harvey rat sarcoma oncogene, subgroup R                                      | Rras        | 1.01±0.03                   | -1.23±0.3                     | -1.21±0.3                    |
| Related RAS viral (r-ras) oncogene homolog 2                                 | Rras2       | -1.07±0.05                  | -1.26±0.4                     | -1.35±0.3                    |
| Serine (or cysteine) peptidase inhibitor, clade E, member 1                  | Serpine1    | 1.11±0.8                    | -1.07±0.9                     | 1.03±0.1                     |
| Src homology 2 domain-containing transforming protein C1                     | Shc1        | -1.09±1.0                   | -1.19±0.7                     | -1.30±0.7                    |
| Solute carrier family 27 (fatty acid transporter), member 4                  | Slc27a4     | 1.00±0.2                    | -1.20±0.7                     | -1.20±0.8                    |
| Solute carrier family 2 (facilitated glucose transporter), member 1          | Slc2a1      | 1.00±0.6                    | 1.03±0.3                      | 1.04±0.02                    |
| Sorbin and SH3 domain containing 1                                           | Sorbs1      | 1.24±0.4                    | -1.12±0.5                     | 1.11±0.3                     |
| Son of sevenless homolog 1 (Drosophila)                                      | Sos1        | 1.02±0.03                   | -1.17±0.3                     | -1.19±0.2                    |
| Sterol regulatory element binding transcription factor 1                     | Srebf1      | -1.39±0.04                  | -1.27±0.3                     | -1.77±0.7                    |
| Thyroglobulin                                                                | Tg          | -1.28±0.5                   | 1.12±0.04                     | -1.61±0.05                   |
| <b>Uncoupling protein 1 (mitochondrial, proton carrier)</b>                  | <b>Ucp1</b> | <b><sup>a</sup>1.22±0.4</b> | <b><sup>b</sup>-31.45±8.4</b> | <b><sup>b</sup>-16.7±4.7</b> |
| Vascular endothelial growth factor A                                         | Vegfa       | -1.33±0.3                   | -1.55±0.5                     | -2.06±0.3                    |

<sup>a</sup>Values significantly different (P<0.05) between treatments are indicated by the letters.
